# Supplementary material
Source: MDPI journal article supplement (https://www.mdpi.com/1999-4907/12/12/1683)
Supplement: s1 [file s1]

Archive with 1 entries (1 files):
- forests-1442430-SM.pdf
